# Supplementary material
Source: PubMed Central journal article supplement (PMC4581435)
Supplement: NIHMS704521-supplement-Supplement.pdf [file NIHMS704521-supplement-Supplement.pdf]

| <b><u>Characteristic</u></b>                        | <b><u>Non-ulcerated<br/>(n=30)</u></b> | <b><u>Ulcerated<br/>(n=32)</u></b> | <b><u>P-value</u></b> |
|-----------------------------------------------------|----------------------------------------|------------------------------------|-----------------------|
| <i>Age (years), median (range)</i>                  | 67 (27-87)                             | 69 (38-87)                         | 0.420                 |
| <i>Sex, no. (%)</i>                                 |                                        |                                    | 0.652                 |
| <i>Male</i>                                         | 19 (63)                                | 22 (69)                            |                       |
| <i>Female</i>                                       | 11 (37)                                | 10 (31)                            |                       |
| <i>Site of Primary Lesion, no. (%)</i>              |                                        |                                    | 0.075                 |
| <i>Axial</i>                                        | 16 (53)                                | 24 (75)                            |                       |
| <i>Extremity</i>                                    | 14 (47)                                | 8 (25)                             |                       |
| <i>Thickness (mm)</i>                               |                                        |                                    | <b>0.015</b>          |
| <i>Mean</i>                                         | 2.84                                   | 4.21                               |                       |
| <i>Median (range)</i>                               | 2.65 (1.20-6.20)                       | 3.24 (1.30-13.00)                  |                       |
| <i>Stage, no. (%)</i>                               |                                        |                                    | 0.960                 |
| <i>Stage II</i>                                     | 18 (60)                                | 19 (59.5)                          |                       |
| <i>Stage III</i>                                    | 12 (40)                                | 13 (40.5)                          |                       |
| <i>Tumor Infiltrating Lymphocytes ,<br/>no. (%)</i> |                                        |                                    | 0.475                 |
| <i>absent</i>                                       | 3 (10)                                 | 6 (19)                             |                       |
| <i>Present</i>                                      | 27 (90)                                | 26 (81)                            |                       |
| <i>CD2+ cells</i>                                   |                                        |                                    |                       |
| <i>Mean</i>                                         | 80.30                                  | 52.20                              | 0.068                 |
| <i>Median (range)</i>                               | 69.75 (8.50-391.44)                    | 46.60 (3.87-130.25)                |                       |
| <i>Status, no. (%)</i>                              |                                        |                                    | 0.077                 |
| <i>Alive</i>                                        | 12 (40)                                | 20 (62.5)                          |                       |
| <i>Dead</i>                                         | 18 (60)                                | 12 (37.5)                          |                       |
| <i>Time to death (months), median<br/>(range)</i>   | 30.5 (16-139)                          | 23 (6-67)                          | 0.138                 |
| <i>Time to censure (months),<br/>median (range)</i> | 55 (4-132)                             | 43 (12-130)                        | 0.690                 |

**Table S1. Comparison of Clinicopathologic Characteristics of Ulcerated and Non-ulcerated Melanomas.**

|                                                                                                                                                                                                    | <u>Non-ulcerated (n=30)</u> |              | <u>Ulcerated (n=32)</u> |              |
|----------------------------------------------------------------------------------------------------------------------------------------------------------------------------------------------------|-----------------------------|--------------|-------------------------|--------------|
|                                                                                                                                                                                                    | OS                          | RFS          | OS                      | RFS          |
| Age                                                                                                                                                                                                | 0.561                       | 0.528        | <b>0.014</b>            | <b>0.028</b> |
| Depth                                                                                                                                                                                              | 0.206                       | 0.216        | 0.138                   | 0.328        |
| Mitotic index                                                                                                                                                                                      | <b>0.003</b>                | <b>0.003</b> | 0.553                   | 0.833        |
| Gender                                                                                                                                                                                             | 0.359                       | 0.282        | 0.658                   | 0.081        |
| Stage                                                                                                                                                                                              | <b>0.038</b>                | <b>0.048</b> | 0.111                   | 0.201        |
| TILs                                                                                                                                                                                               | 0.237                       | 0.209        | <b>0.004</b>            | <b>0.001</b> |
| Bolded figures are statistically significant, $p < 0.05$<br>Quantitative variables: Age, Depth, Mitotic index. Categorical variables: Gender (M or F), TILs (absent or present), Stage (II or III) |                             |              |                         |              |

**Table S2. Multivariate Cox Regression Analysis Including TILs: Predictors of Overall Survival (OS) and Recurrence Free Survival (RFS) in Ulcerated and Non-ulcerated melanomas.**

TILs are associated with improved OS and RFS in ulcerated melanoma tumors but not in non-ulcerated melanomas.

|                                                                                     | <b>Non-ulcerated (n=30)</b> |              | <b>Ulcerated (n=32)</b> |              |
|-------------------------------------------------------------------------------------|-----------------------------|--------------|-------------------------|--------------|
|                                                                                     | <b>OS</b>                   | <b>RFS</b>   | <b>OS</b>               | <b>RFS</b>   |
| Age                                                                                 | 0.480                       | 0.572        | <b>0.020</b>            | <b>0.036</b> |
| Depth                                                                               | 0.210                       | 0.193        | 0.084                   | 0.158        |
| Mitotic index                                                                       | <b>0.003</b>                | <b>0.003</b> | 0.163                   | 0.212        |
| CD2                                                                                 | 0.363                       | 0.600        | 0.084                   | <b>0.013</b> |
| Gender                                                                              | 0.232                       | 0.316        | 0.496                   | 0.235        |
| Stage                                                                               | <b>0.038</b>                | <b>0.041</b> | 0.085                   | 0.075        |
| TILs                                                                                | 0.281                       | 0.186        | 0.177                   | 0.222        |
| Bolded figures are statistically significant, p<0.05                                |                             |              |                         |              |
| Quantitative variables: Age, Depth, Mitotic index, CD2                              |                             |              |                         |              |
| Categorical variables: Gender (M or F), TILs (absent or present), Stage (II or III) |                             |              |                         |              |

**Table S3. Multivariate Cox Regression Analysis Including CD2 and TILs: Predictors of Overall Survival (OS) and Recurrence Free Survival (RFS) in Ulcerated and Non-ulcerated Melanomas.**

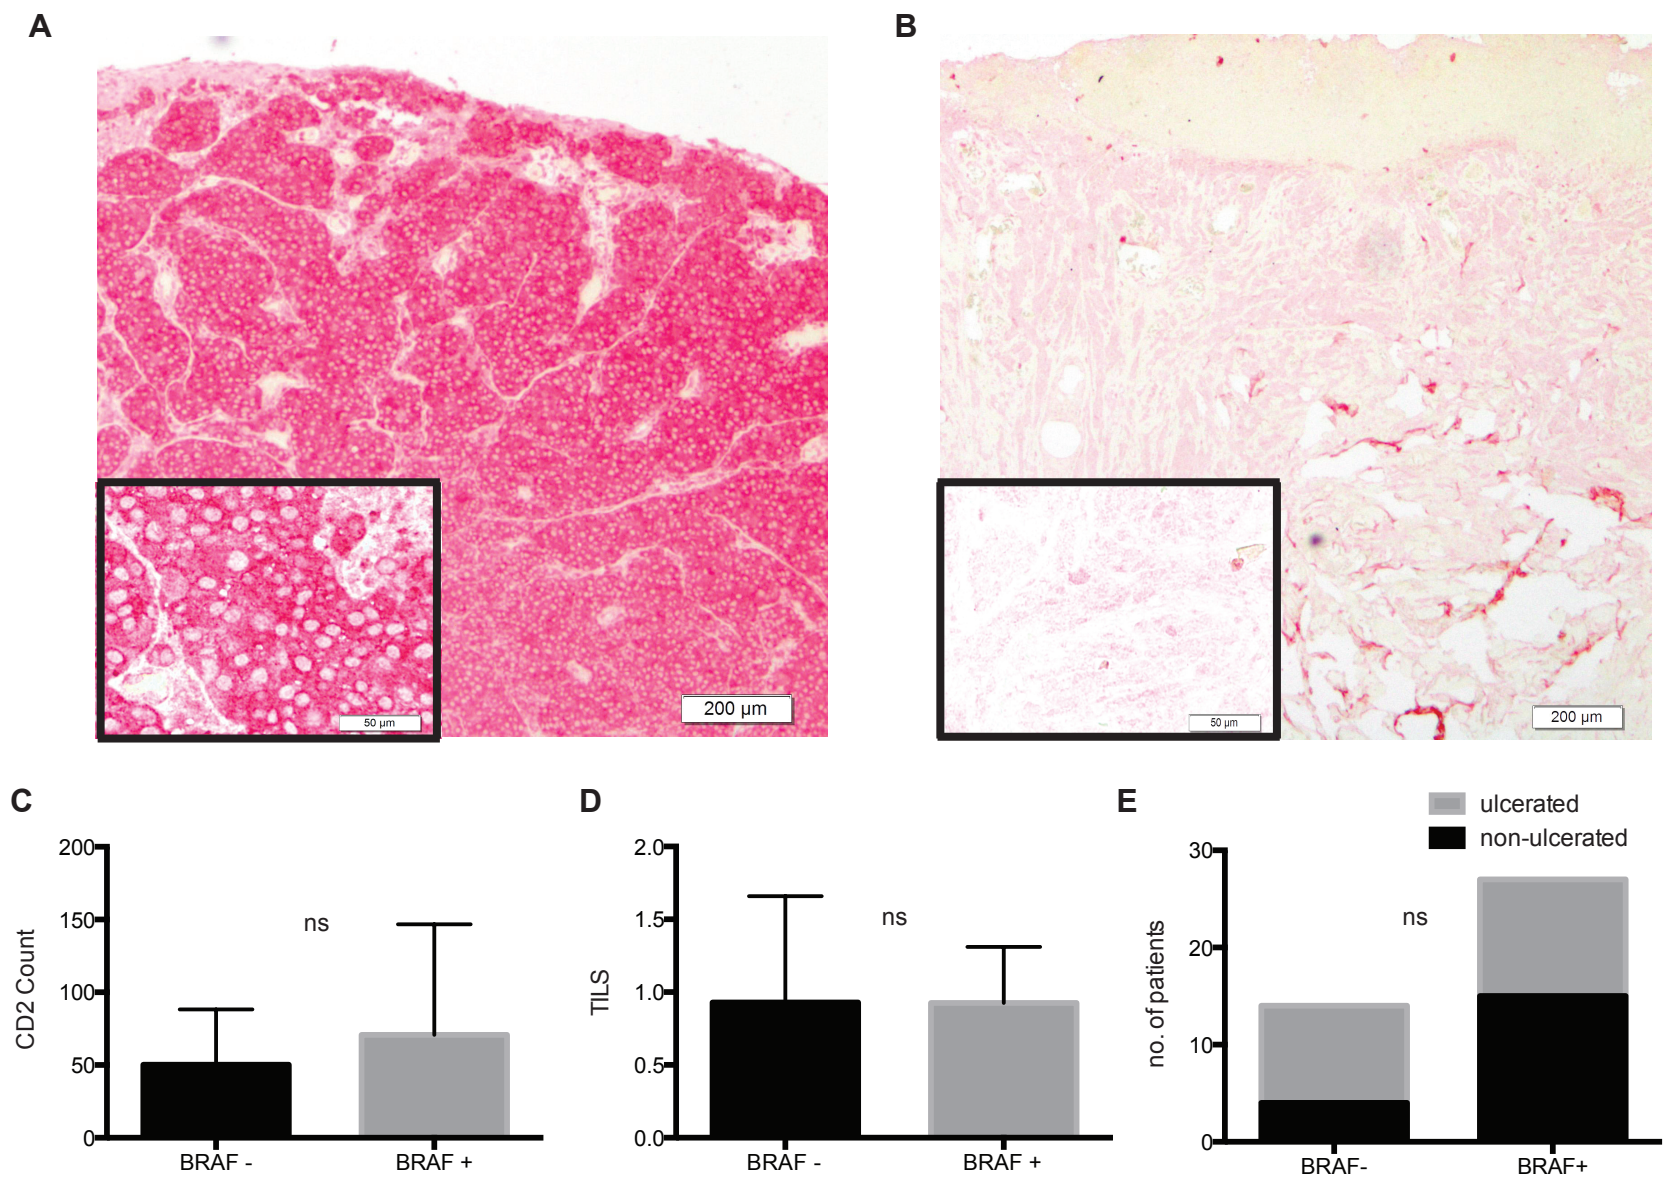

**Fig. S1 BRAF status does not correlate with TILs, CD2, or ulceration status.** **A-B** Representative images of BRAF staining with anti-VE1 antibody. **(A)** 3+ staining of VE1 antibody (x40 and x100, inset) **(B)** 0+ staining with VE1 antibody (40×, 100× inset). **(C)** CD2 count and BRAF status show no significant correlation ( $p=0.463$ , Mann Whitney test). **(D)** TILs and BRAF status show no correlation ( $p=0.785$ , Mann Whitney test). **(E)** Ulceration status and BRAF-status do not correlate ( $p=0.185$ , Fisher's exact test)

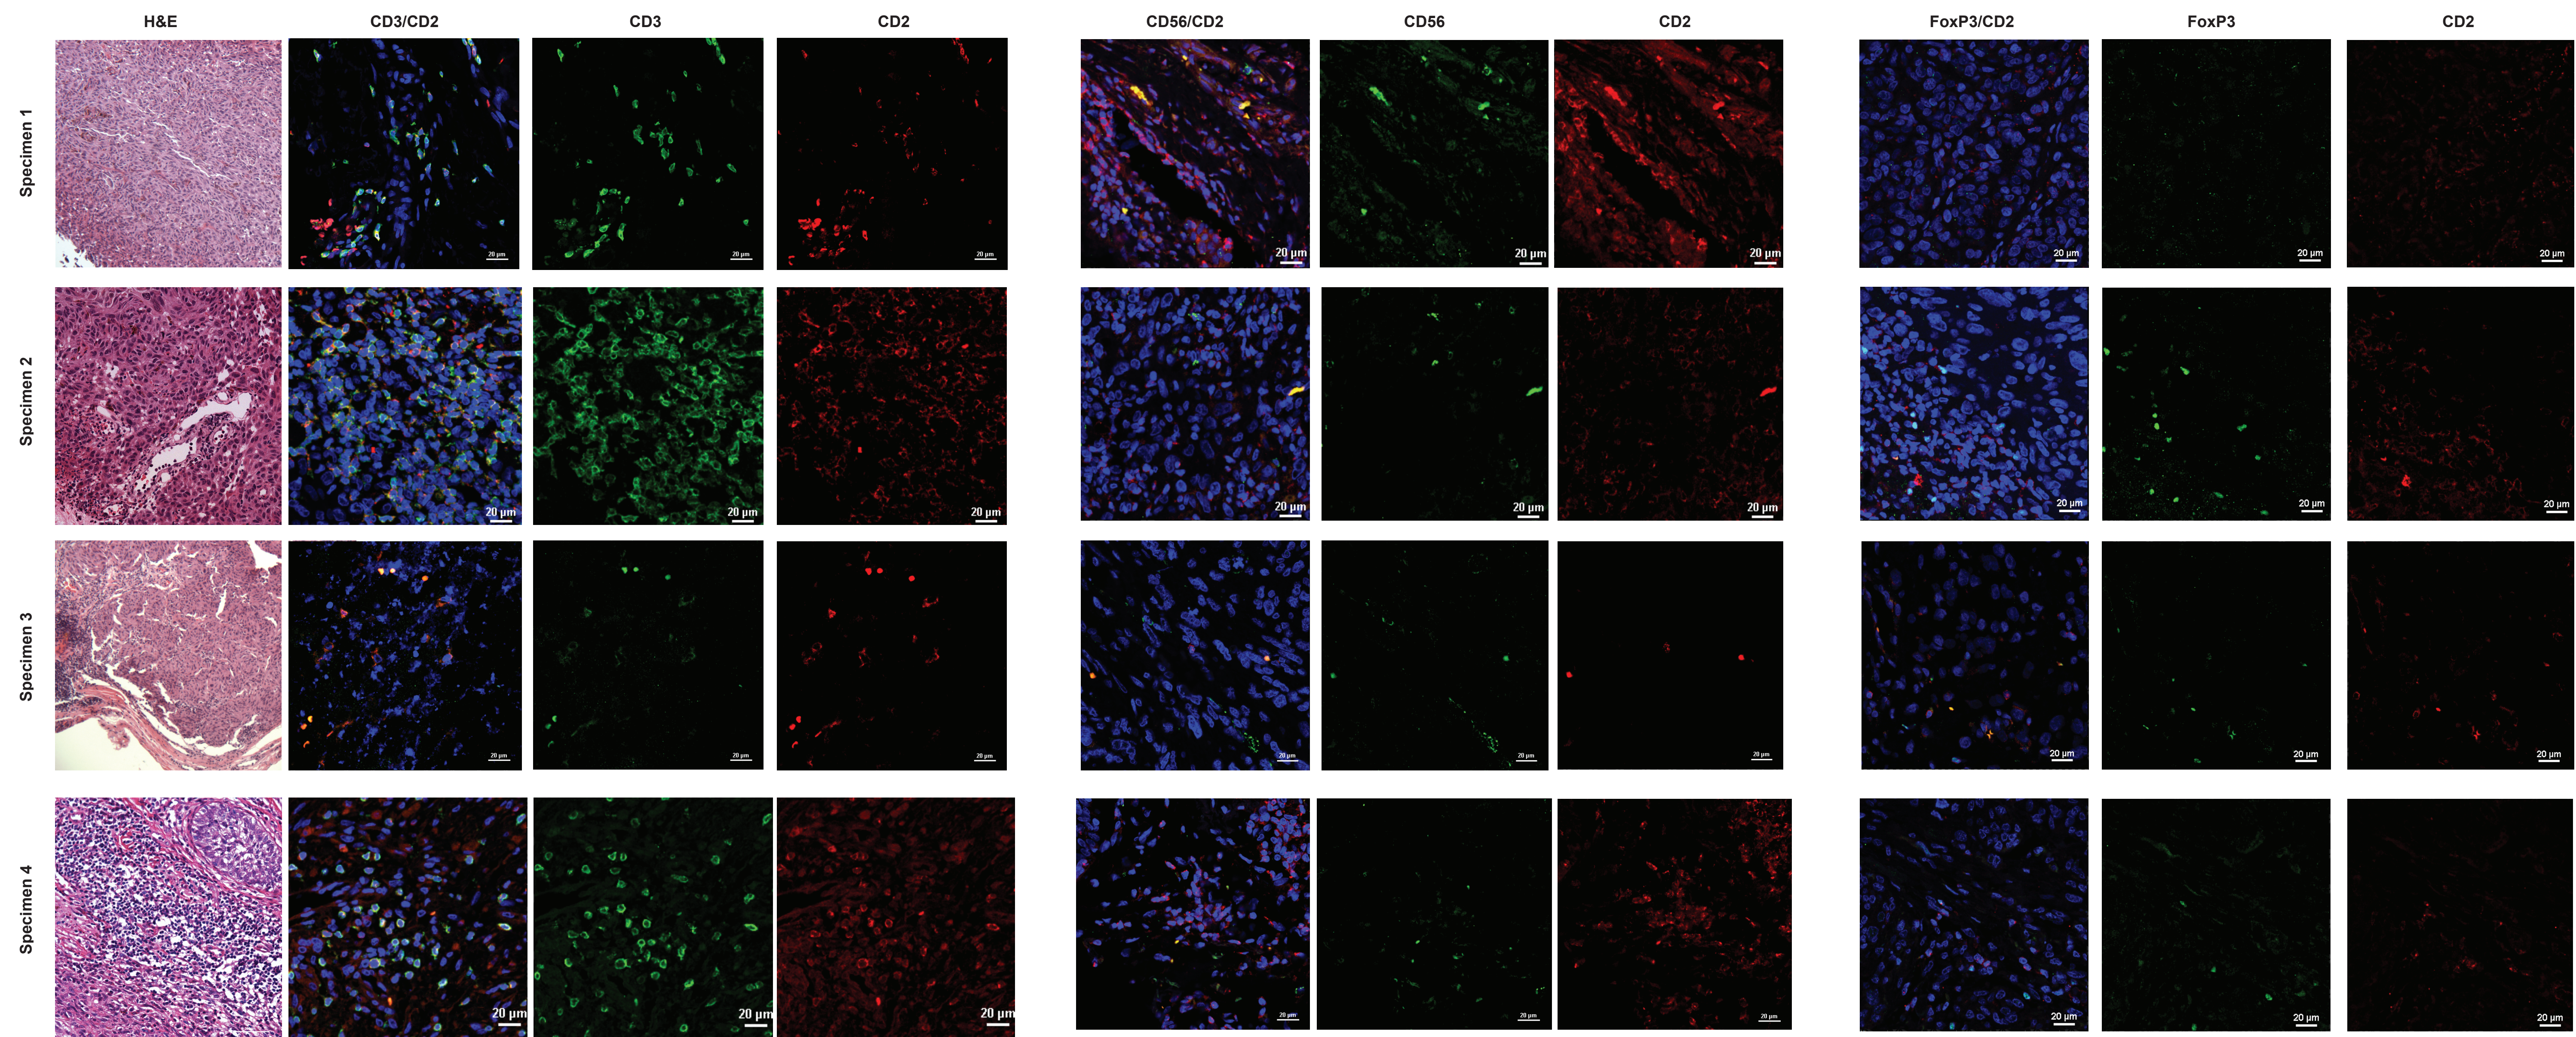

**Fig. S2 Additional immunofluorescence stain of CD2/CD3 and CD2/CD56 co-localization.** Charged slides of two melanoma specimens with high CD2 counts (top two rows) and two specimens with low CD2 counts were co-stained with DAPI and either anti-CD2 and anti-CD3, anti-CD2 and anti-CD56, or anti-Foxp3 and anti-CD2 antibodies. Merged images of co-localization and single channels of anti-CD2, anti-CD3, anti-CD56 and anti-Foxp3 are shown. H&E images of the stained areas are shown to confirm lymphocyte infiltration in the tumors

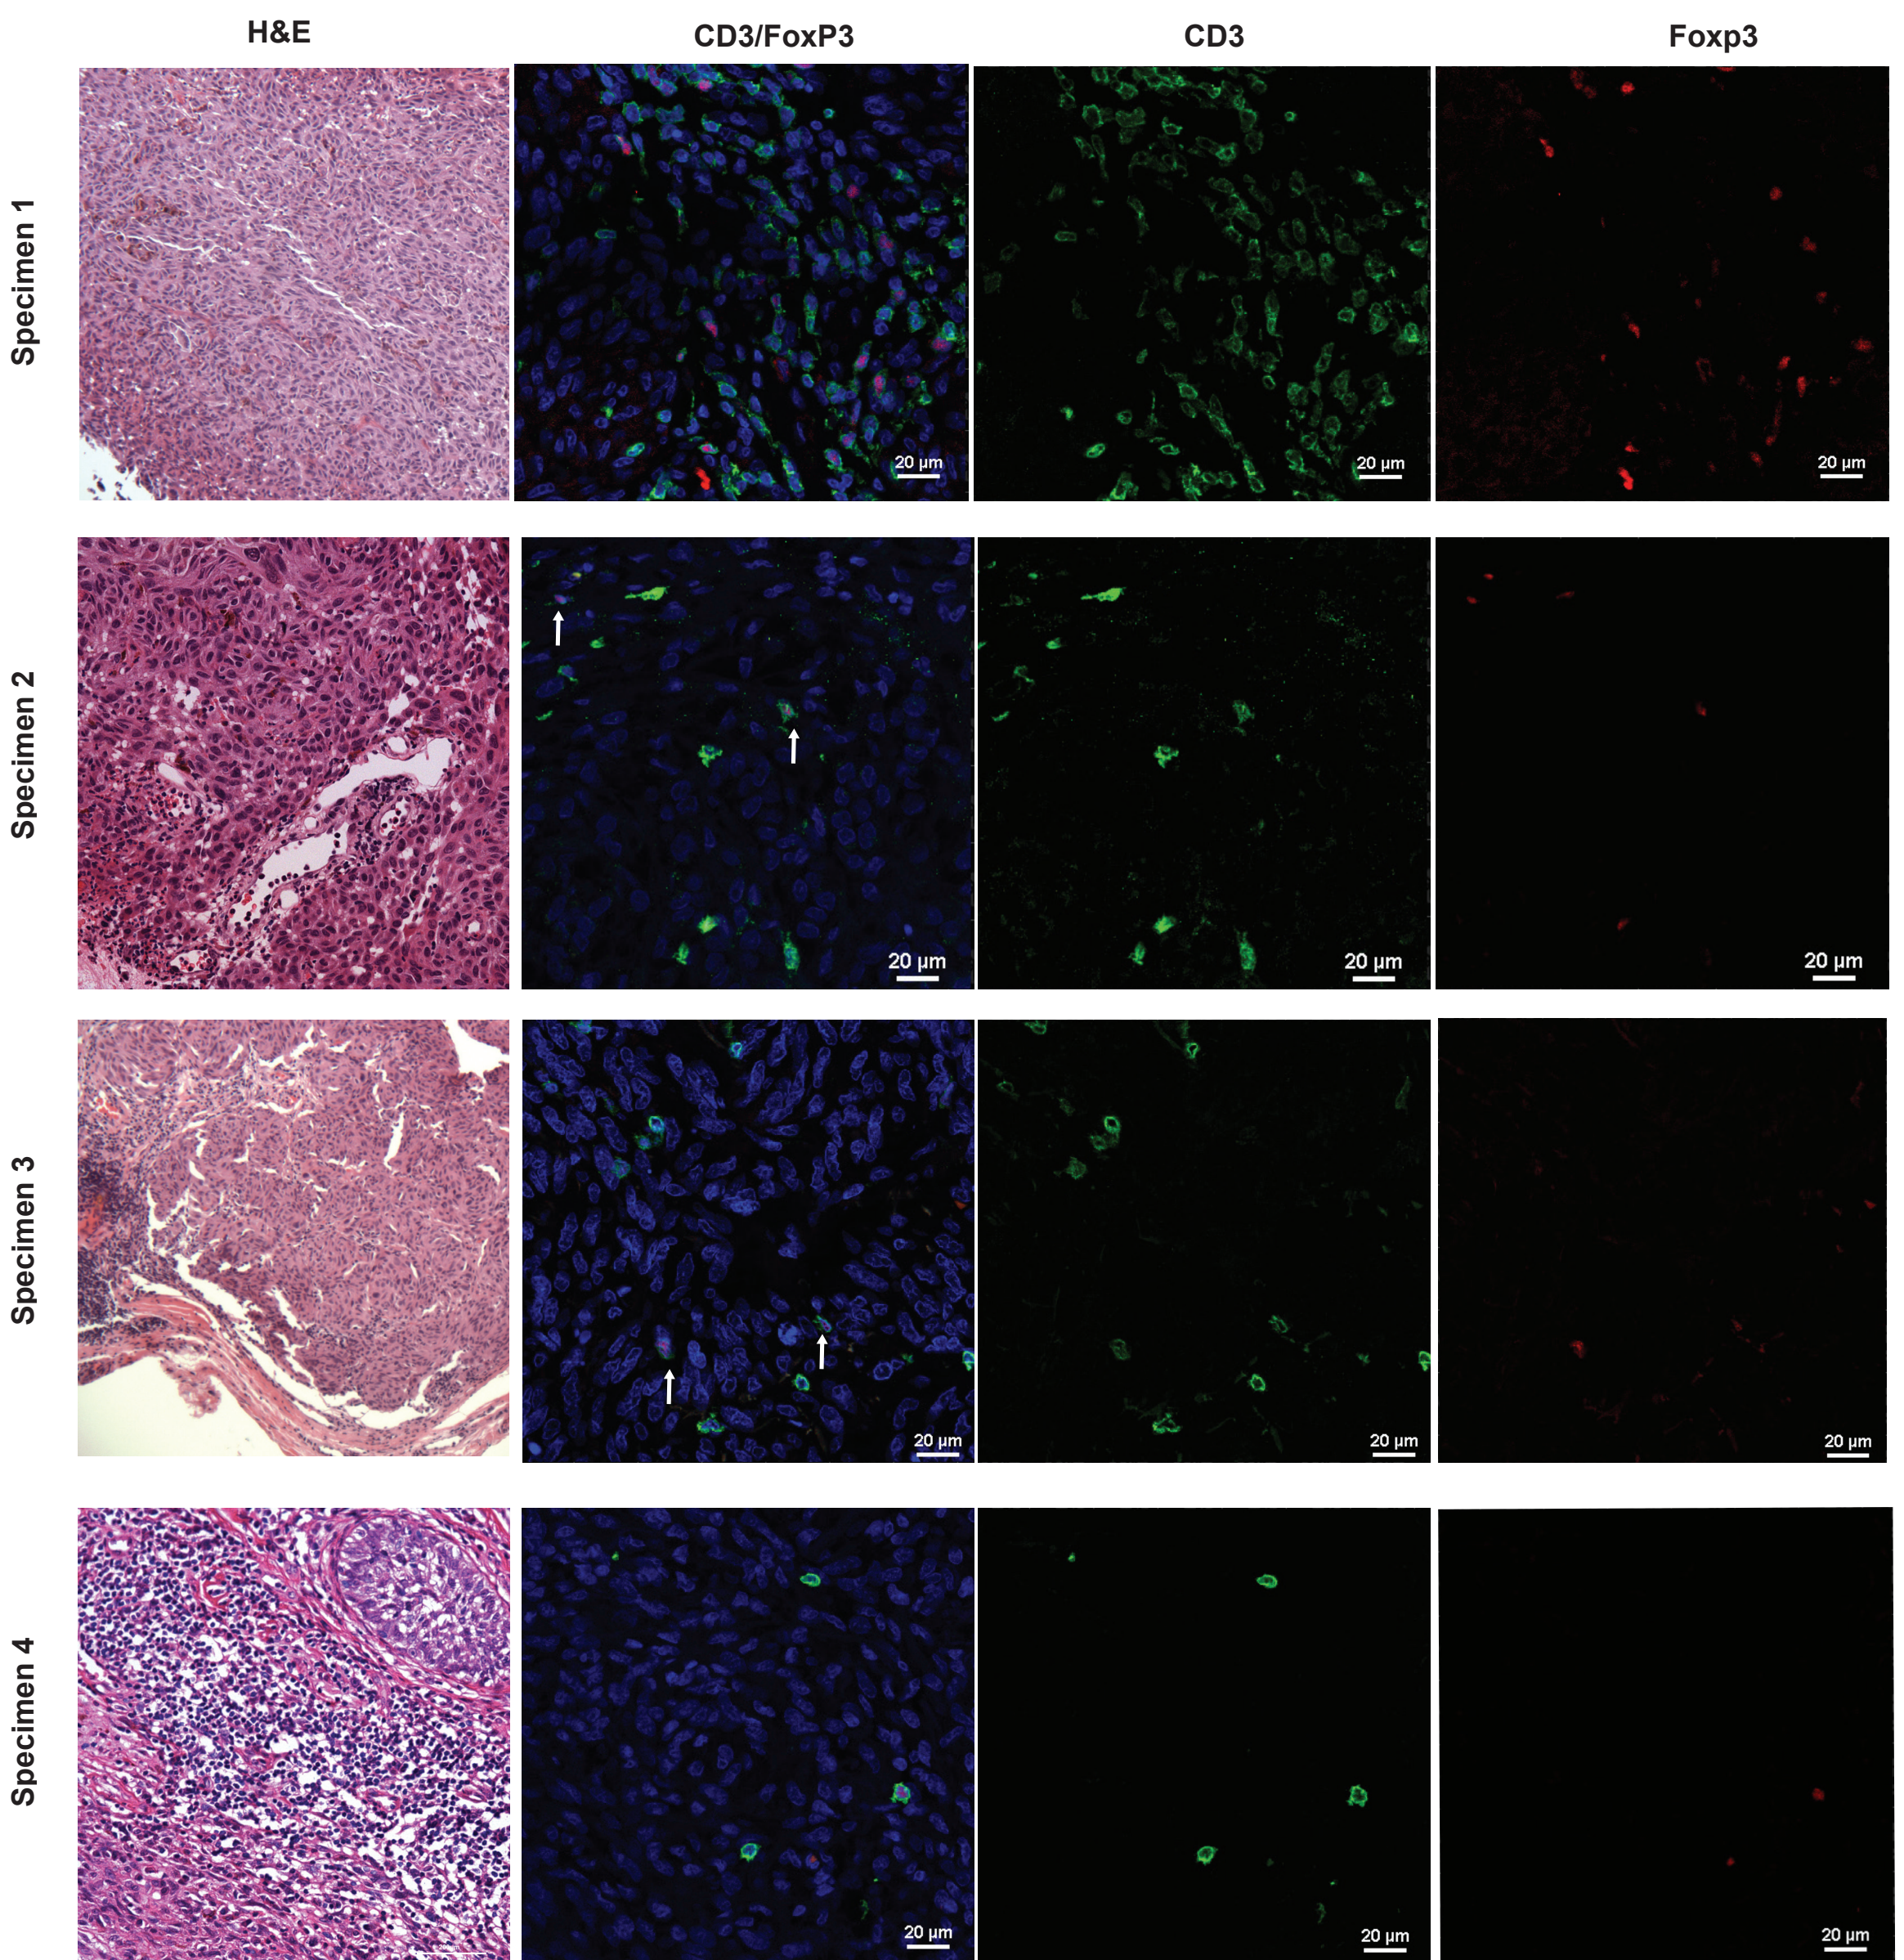

**Fig. S3 Immunofluorescence stain of CD3/Foxp3 co-localization.** Charged slides of two melanoma specimens with high CD2 counts (top two rows) and two specimens with low CD2 counts were co-stained with DAPI, anti-CD3 and anti-Foxp3 antibodies. Merged images of co-localization and single channels of anti-CD3 and anti-Foxp3 are shown. H&E images of the stained areas are shown to confirm lymphocyte infiltration in the tumors. White arrows in row 2 and 3 showed cells positive for both CD3 and Foxp3
